# Supplementary material
Source: publisher figshare collection journal article supplement (https://acs.figshare.com/ndownloader/files/4514773)
Supplement: Supplementary file 1 [file 4514773]

**Supporting Information**  
**For**  
**H<sub>2</sub>-Driven Deoxygenation of Epoxides and Diols to Alkenes Catalyzed by**  
**Methyltrioxorhenium (MTO)**

Jeanette E. Ziegler, Michael J. Zdilla, Andrew J. Evans, and Mahdi M. Abu-Omar

*Brown Laboratory, The Center for Catalytic Conversion of Biomass to Biofuels (C<sup>3</sup>Bio), Department of  
Chemistry, Purdue University, 560 Oval Drive, West Lafayette, Indiana 47907, USA*

**Experimental Methods**

**General.** Methyltrioxorhenium (MTO) was purchased from Strem Chemicals, Inc. (Newburyport, MA). All other chemicals were purchased from Aldrich (Milwaukee, WI) and used as received. Deoxygenation reactions were performed in a 100 mL, model number 4593, high-pressure Parr reactor, inside a fitted glass sleeve. Gas chromatography was performed with an Agilent Technologies 6890N Network GC System with a J&W Scientific DB-5 capillary column. Oven temperature was ramped from 40 to 70 °C at 5°C/min, and from 70 to 230 °C at 25°C/min in constant flow mode at 1.0 mL/min. Peaks in the GC trace were identified and quantified by comparison to an anthracene internal standard. Mass spectrometry was performed by the Purdue University Campus-Wide Mass Spectrometry Center on a Hewlett Packard Engine mass spectrometer (GC/MS).

**Typical deoxygenation procedure.** MTO (0.12 or 0.06 mmol) and epoxide/diol (1.2 mmol) were mixed together in 15 mL of THF and placed in a high-pressure Parr reactor. The inert atmosphere was replaced by H<sub>2</sub> and the reaction mixture was stirred under the desired pressure (80, 300, or 500 psi) of H<sub>2</sub>. The heating mantle was programmed to ramp up at 60 °C/hour to 150 °C. Once at 150°C, the heating mantle was programmed to soak for the desired time (typically 8 h). After the soaking period, the reaction mixture was allowed to cool to room temperature. The entire sample was spiked with a known amount of anthracene (standard) and analyzed by GC. Product yields were calculated from GC-peak integrations versus anthracene and utilizing response factors that were obtained using authentic samples. All GC peaks were confirmed by GC/MS.

**Liquid sampling procedure.** MTO (8.0 mM) and styrene oxide (80 mM) were mixed together in 45 mL of THF in a high-pressure Parr reactor. The mixture was pressurized under dihydrogen (H<sub>2</sub>) to 300 psi, heated to 150 °C and stirred. Liquid samples were retrieved from a side-arm attached to an internal sampling tube. Liquid samples were ca. 1.0 mL in size. These samples were spiked with a known amount of anthracene and analyzed by GC using response factors determined from authentic samples (of styrene oxide, phenyl-1,2-ethanediol, styrene, and ethyl benzene).

While the described sampling provides useful mechanistic information, it presents several difficulties and limitations. The larger volume of solvent makes stirring (and therefore H<sub>2</sub> phase transfer) less efficient. In addition, each time a sample is removed there is an increase in headspace, thereby decreasing the H<sub>2</sub> pressure. This decreases solution concentrations of H<sub>2</sub> and thus affects reaction rates. While the sampling experiments exhibit kinetic differences from small scale constant volume and pressure runs, they do provide useful qualitative information.
